# Supplementary material for: Comparative Efficacy of Pyrethroid-Based Paints against Turkestan Cockroaches
Source: MDPI journal article supplement (doi:10.3390/insects15030171), 2024-03-03
Supplement: s1 [file s1]

Table S1. Mortality percentage (mean  $\pm$  SE) at day 14 of cockroach nymphs exposed for 15 min or 1 h to fresh or 1-month aged insecticide-based paints on various substrates.

| <b>Insecticide</b>     | <b>Treatment</b> | <b>Concrete</b> | <b>Metal</b> | <b>PVC</b>  |
|------------------------|------------------|-----------------|--------------|-------------|
| 0.7% alphacypermethrin | Control          | 8 $\pm$ 6       | 6 $\pm$ 2    | 8 $\pm$ 6   |
|                        | Fresh-15 min     | 12 $\pm$ 7      | 10 $\pm$ 4   | 10 $\pm$ 5  |
|                        | Fresh-1h         | 34 $\pm$ 7      | 20 $\pm$ 5   | 20 $\pm$ 4  |
|                        | 1 month aged-1h  | 54 $\pm$ 17     | 82 $\pm$ 6   | 50 $\pm$ 10 |
| 0.25% deltamethrin     | Control          | 8 $\pm$ 6       | 6 $\pm$ 2    | 8 $\pm$ 6   |
|                        | Fresh-15 min     | 8 $\pm$ 6       | 10 $\pm$ 5   | 14 $\pm$ 4  |
|                        | Fresh-1h         | 16 $\pm$ 5      | 10 $\pm$ 4   | 18 $\pm$ 9  |
|                        | 1 month aged-1h  | 40 $\pm$ 14     | 54 $\pm$ 9   | 44 $\pm$ 11 |
| 0.5% transfluthrin     | Control          | 8 $\pm$ 6       | 6 $\pm$ 2    | 8 $\pm$ 6   |
|                        | Fresh-15 min     | 8 $\pm$ 6       | 10 $\pm$ 6   | 6 $\pm$ 4   |
|                        | Fresh-1h         | 14 $\pm$ 9      | 12 $\pm$ 8   | 14 $\pm$ 9  |
|                        | 1 month aged-1h  | 14 $\pm$ 2      | 12 $\pm$ 8   | 2 $\pm$ 2   |
